# Supplementary material
Source: PubMed Central journal article supplement (PMC2522288)

**Supporting Information for**  
**Biosynthetic Tailoring of Microcin E492m: Post-Translational Modification**  
**Affords an Antibacterial Siderophore-Peptide Conjugate**

Elizabeth M. Nolan, Michael A. Fischbach, Alexander Koglin and Christopher T. Walsh\*

*Department of Biological Chemistry and Molecular Pharmacology, Harvard Medical School, Boston, MA 02115*

\*Corresponding author: [christopher\\_walsh@hms.harvard.edu](mailto:christopher_walsh@hms.harvard.edu)

Complete ref. 27:

Welch, R. A.; Burland, V.; Plunkett, G.; Redford, P.; Roesch, D.; Rasko, D.; Buckles, E. L.; Liou, S.-R.; Boutin, A.; Hackett, J.; Stroud, D.; Mayhew, G. F.; Rose, D. J.; Zhou, S.; Schwartz, D. C.; Perna, N. T.; Mobley, H. L. T.; Donnenberg, M. S.; Blattner, F. R. *Proc. Natl. Acad. Sci. USA* **2002**, *99*, 17020-17024.

**Substrate Preparations.**

**Preparation of Ent and Glycosylated Ent.** Enterobactin was synthesized as described in the literature.<sup>1-3</sup> IroB-catalyzed reactions were performed to obtain multi-milligram quantities of MGE and DGE for use in enzymatic assays.<sup>4</sup> A 15 mL solution containing Ent (15.6 mg, 23  $\mu$ mol, dissolved in 500  $\mu$ L DMSO), UDP-Glc (124 mg, 1.64 mmol), 5 mM MgCl<sub>2</sub>, 2.5 mM TCEP and 75 mM Tris-HCl buffered at pH 8 was incubated at room temperature for 3.5 h, quenched by addition of 7 mL of 2.5 N HCl in MeOH, vortexed and filtered through a 0.2  $\mu$ m membrane. Preparative HPLC using a gradient of 0 to 40% B (solvent A, 0.2% TFA/H<sub>2</sub>O; solvent B, MeCN) over 40 min and a flow-rate of 10 mL/min afforded pure MGE (30.9 mg, 37.1  $\mu$ mol) and DGE (14.3 mg, 14.4  $\mu$ mol). Product purity was verified by analytical HPLC and identity by co-elution with known standards and MS. LRMS [M+H]<sup>+</sup> *m/z* calc 832.2 (MGE), 994.3 (DGE); found, 832.1, 994.2.

**Large-Scale Enzymatic Preparation of lin-Ent.** Ent (20 mg, 30  $\mu$ mol) was dissolved in 400  $\mu$ L of DMSO and diluted with 15 mL of 75 mM Hepes pH 7.5 buffer. A portion (135  $\mu$ L of 71  $\mu$ M stock) of MceD was added and the solution was mixed and incubated at room temperature for 27 min, and quenched with 5 mL of 2.5 N HCl in MeOH. The mixture was vortexed and filtered through a 0.2  $\mu$ m membrane. Preparative HPLC using a solvent gradient of 15 to 60% B (solvent A, 0.1% TFA/H<sub>2</sub>O; solvent B, MeCN) allowed for separation of the reaction components. The compounds were collected and lyophilized to dryness, which afforded white powders. The identity of lin-Ent was verified by MS and co-elution with lin-Ent prepared from a IroD-catalyzed reaction.<sup>5</sup> LRMS: [M+H]<sup>+</sup> *m/z* calc, 688.2; found, 688.3.

**Preparation of Ferric Ent, MGE and DGE.** The ferric complexes of Ent, MGE and DGE were prepared from FeCl<sub>3</sub> and siderophore in the presence of

base by modification of existing protocols.<sup>5,6</sup> For  $[\text{Fe}(\text{Ent})]^{3+}$ : A 50.3-mL portion of Ent (10.5 mM in DMSO) was diluted with 49.7  $\mu\text{L}$  of MeOH (5.28 mM final concentration) and aqueous  $\text{FeCl}_3$  (5.28 mM, 110  $\mu\text{L}$ ) was added. The solution turned purple and was mixed with a pipette. A 7-mL aliquot of 1 M  $\text{K}_2\text{CO}_3$  was added and the solution was mixed and turned wine-colored. The reaction was loaded onto a Sephadex LH-20 column packed with MeOH and eluted with MeOH. The  $[\text{Fe}(\text{Ent})]^{3+}$  containing fractions were concentrated to dryness and the resulting dark-red residue was dissolved in 150  $\mu\text{L}$  of DMSO. The product identity was verified and stock concentration determined by UV-vis. For  $[\text{Fe}(\text{MGE})]^{3+}$ : As described for  $[\text{Fe}(\text{Ent})]^{3+}$  except that the 5.28 mM MGE solution was prepared in 1:1 MeOH/ $\text{H}_2\text{O}$ . For  $[\text{Fe}(\text{DGE})]^{3+}$ : As described for  $[\text{Fe}(\text{Ent})]^{3+}$  except that the DGE solution was prepared in MeOH (1.33 mM) and the  $\text{FeCl}_3$  solution was also 1.33 mM.

## References

- (1) Ramirez, R. J. A.; Karamanukyan, L.; Ortiz, S.; Guitierrez, C. G. *Tetrahedron Lett.* **1997**, *38*, 749-752.
- (2) Gardner, R. A.; Kinkade, R.; Wang, C.; Phastiel, O. I. *J. Org. Chem.* **2004**, *69*, 3530-3537.
- (3) Deleuze, H.; Maillard, B. *J. Organomet. Chem.* **1995**, *490*, C14-C17.
- (4) Fischbach, M. A.; Lin, H.; Liu, D. R.; Walsh, C. T. *Proc. Natl. Acad. Sci. USA* **2005**, *102*, 571-576.
- (5) Lin, H.; Fischbach, M. A.; Liu, D. R.; Walsh, C. T. *J. Am. Chem. Soc.* **2005**, *127*, 11075-11084.
- (6) Abergel, R. J.; Warner, J. A.; Shuh, D. K.; Raymond, K. N. *J. Am. Chem. Soc.* **2006**, *128*, 8920-8931.

**Table S1.** Mass Data ( $m/z$ ) for Hydrolysis Products from MceD-Catalyzed Reactions

| Substrate | Product         | Calc<br>[M+H] <sup>+</sup> | Found<br>[M+H] <sup>+</sup> | Calc<br>[M-H] <sup>-</sup> | Found<br>[M-H] <sup>-</sup> |
|-----------|-----------------|----------------------------|-----------------------------|----------------------------|-----------------------------|
| Ent       |                 | 670.2                      | 670.2                       |                            |                             |
|           | lin-Ent         | 688.2                      | 688.3                       |                            |                             |
|           | DHB-Ser Dimer   | 465.1                      | 465.1                       |                            |                             |
|           | DHB-Ser Monomer |                            |                             | 240.1                      | n.d. <sup>a</sup>           |
| MGE       |                 | 832.2                      | 832.1                       |                            |                             |
|           | lin-MGE         | 850.2                      | 850.1                       |                            |                             |
|           | Glc-Dimer       | 627.2                      | 627.1                       |                            |                             |
|           | Glc-Monomer     | 404.1                      | n.d.                        |                            |                             |
|           | DHB-Ser         |                            |                             | 240.1                      | n.d.                        |
| DGE       |                 | 994.3                      | 994.1                       |                            |                             |
|           | lin-DGE         | 1012.3                     | 1012.2                      |                            |                             |
|           | Glc-Dimer       | 627.2                      | 627.3                       |                            |                             |
|           | Glc-Monomer     | 404.1                      | n.d.                        |                            |                             |
|           | DHB-Ser Monomer |                            |                             | 240.1                      | n.d.                        |

<sup>a</sup> n.d. = not determined

**Table S2.** NOE Correlations for C<sub>10</sub>-C6'-MGE (left) and C<sub>10</sub>-C4'-MGE (right)

| Group     | Atom | Nuc | Shift | Group     | Atom | Nuc | Shift |
|-----------|------|-----|-------|-----------|------|-----|-------|
| <b>C6</b> |      |     |       | <b>C4</b> |      |     |       |
| Glc       | H1   | 1H  | 3.987 | Glc       | H1   | 1H  | 4.077 |
| Glc       | H2   | 1H  | 3.462 | Glc       | H2   | 1H  | 3.474 |
| Glc       | H3   | 1H  | 3.575 | Glc       | H3   | 1H  | 3.590 |
| Glc       | H4   | 1H  | 3.715 | Glc       | H4   | 1H  | 4.960 |
| Glc       | H5   | 1H  | 3.510 | Glc       | H5   | 1H  | 3.545 |
| Glc       | H61  | 1H  | 4.454 | Glc       | Q6   | 1H  | 3.983 |
| Glc       | H62  | 1H  | 4.244 | DHB1      | H4   | 1H  | 7.033 |
| DHB1      | H4   | 1H  | 7.021 | DHB1      | H6   | 1H  | 7.184 |
| DHB1      | H6   | 1H  | 7.156 | DHB1      | H9   | 1H  | 4.999 |
| DHB1      | H9   | 1H  | 4.957 | DHB1      | HN   | 1H  | 9.027 |
| DHB1      | HN   | 1H  | 8.945 | DHB2      | H4   | 1H  | 6.933 |
| DHB2      | H4   | 1H  | 6.912 | DHB2      | H5   | 1H  | 6.647 |
| DHB2      | H5   | 1H  | 6.612 | DHB2      | H6   | 1H  | 7.000 |
| DHB2      | H6   | 1H  | 6.970 | DHB2      | H9   | 1H  | 4.890 |
| DHB2      | H9   | 1H  | 4.898 | DHB2      | HN   | 1H  | 8.805 |
| DHB2      | HN   | 1H  | 8.692 | DHB3      | H4   | 1H  | 6.933 |
| DHB3      | H4   | 1H  | 6.908 | DHB3      | H5   | 1H  | 6.645 |
| DHB3      | H5   | 1H  | 6.610 | DHB3      | H6   | 1H  | 7.002 |
| DHB3      | H6   | 1H  | 6.956 | DHB3      | H9   | 1H  | 4.915 |
| DHB3      | H9   | 1H  | 5.041 | DHB3      | HN   | 1H  | 8.778 |
| DHB3      | HN   | 1H  | 8.733 | S1        | HA   | 1H  | 4.117 |
| S1        | HA   | 1H  | 4.114 | S1        | HN   | 1H  | 8.410 |
| S1        | HN   | 1H  | 8.366 | S1        | QB   | 1H  | 3.953 |
| S1        | QB   | 1H  | 3.853 | A2        | HA   | 1H  | 4.390 |
| A2        | HA   | 1H  | 4.404 | A2        | HN   | 1H  | 8.713 |
| A2        | HN   | 1H  | 8.709 | A2        | QB   | 1H  | 1.371 |
| A2        | QB   | 1H  | 1.369 | T3        | HA   | 1H  | 4.324 |
| T3        | HA   | 1H  | 4.196 | T3        | HB   | 1H  | 4.188 |
| T3        | HB   | 1H  | 4.181 | T3        | QG2  | 1H  | 1.142 |
| T3        | QG2  | 1H  | 1.141 | T3        | HN   | 1H  | 8.154 |
| T3        | HN   | 1H  | 8.150 | S4        | HA   | 1H  | 4.632 |
| S4        | HA   | 1H  | 4.317 | S4        | HN   | 1H  | 8.238 |
| S4        | HN   | 1H  | 8.168 | S4        | QB   | 1H  | 3.968 |
| S4        | QB   | 1H  | 3.917 | S5        | HA   | 1H  | 4.452 |
| S5        | HN   | 1H  | 7.796 | S5        | HN   | 1H  | 8.280 |
| S5        | QB   | 1H  | 3.781 | S5        | QB   | 1H  | 3.804 |
| S6        | HN   | 1H  | 8.189 | S6        | HA   | 1H  | 4.463 |
| S6        | QB   | 1H  | 3.938 | S6        | HB2  | 1H  | 3.858 |
| G7        | HN   | 1H  | 8.324 | S6        | HB3  | 1H  | 3.790 |
| G7        | QA   | 1H  | 4.373 | S6        | HN   | 1H  | 8.375 |
| S8        | HA   | 1H  | 4.489 | G7        | HN   | 1H  | 7.132 |
| S8        | HN   | 1H  | 8.283 | S8        | HA   | 1H  | 4.420 |
| S8        | QB   | 1H  | 3.960 | S8        | HN   | 1H  | 8.313 |
| G9        | HN   | 1H  | 8.265 | S8        | QB   | 1H  | 3.825 |
| G9        | QA   | 1H  | 4.428 | G9        | HN   | 1H  | 8.203 |
| S10       | HA   | 1H  | 4.470 | G9        | QA   | 1H  | 4.405 |
| S10       | HN   | 1H  | 7.072 | S10       | HA   | 1H  | 4.001 |
| S10       | QB   | 1H  | 3.949 | S10       | HN   | 1H  | 7.067 |
|           |      |     |       | S10       | QB   | 1H  | 3.496 |

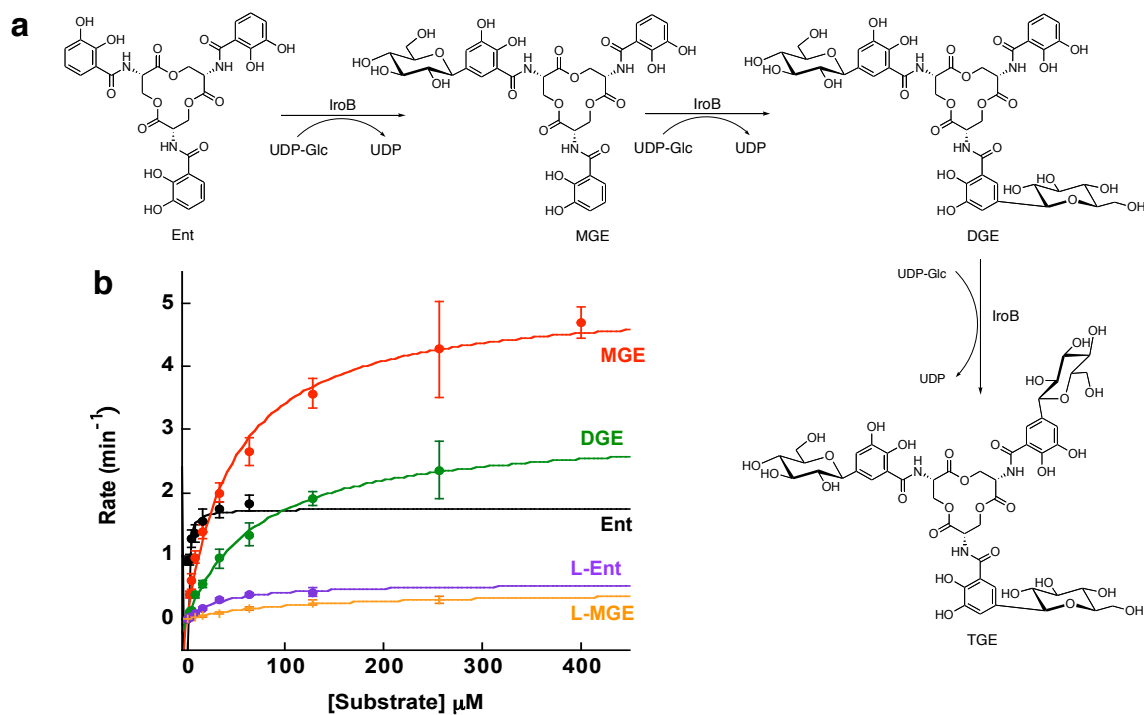

**Figure S1.** C-Glycosylation of Ent by IroB to give MGE, DGE and TGE. (b) Kinetic data for IroB-catalyzed C-glycosylation. Corresponding  $k_{cat}$  and  $K_m$  values are given in Table 1 of the main text.

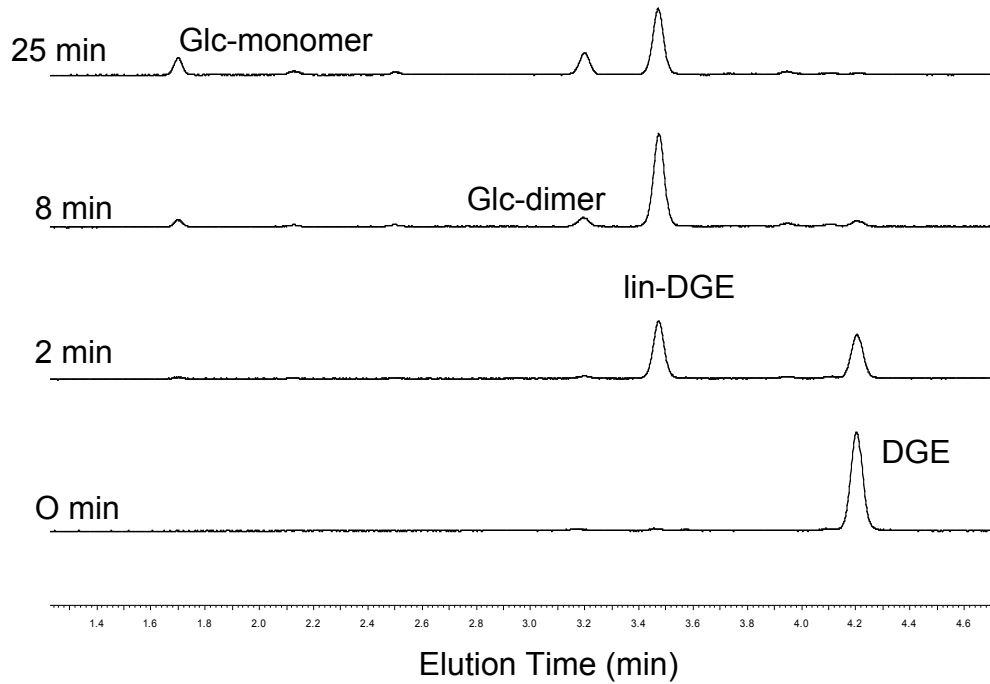

**Figure S2.** HPLC analysis of the MceD-catalyzed hydrolysis of DGE (75 mM HEPES, pH 7.5). The concentration of DGE was 32  $\mu$ M and 20 nM MceD was employed. MS values for the products are listed in Table S1.



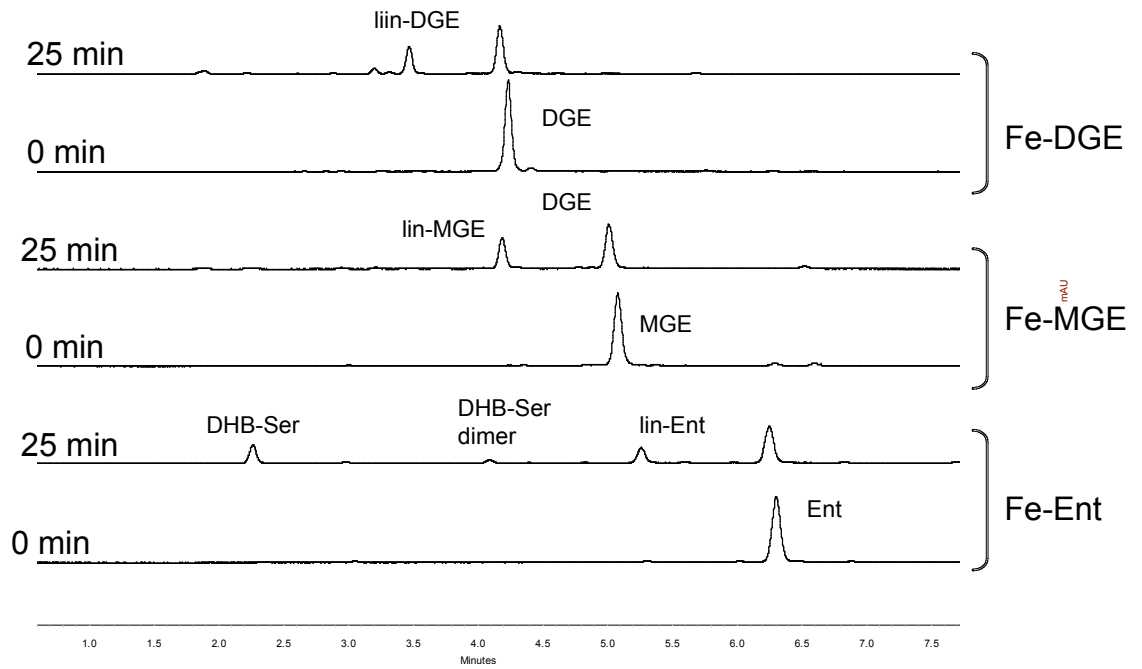

**Figure S3.** MceD-catalyzed hydrolysis of  $[\text{Fe}(\text{Ent})]^{3-}$ ,  $[\text{Fe}(\text{MGE})]^{3-}$  and  $[\text{Fe}(\text{DGE})]^{3-}$  (75 mM HEPES, pH 7.5). The MceD concentration was 20 nM and the substrate concentrations were 32  $\mu\text{M}$ .

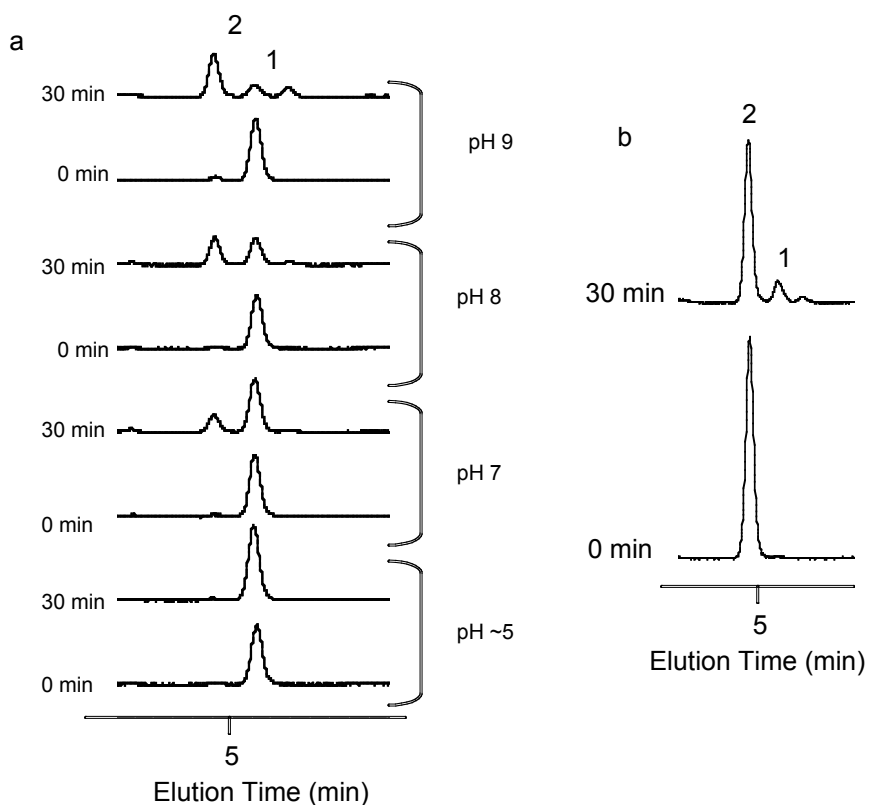

**Figure S4.** (a) Effect of pH on the migration of  $C_{10}$  from the  $C4'$  to the  $C6'$  position of the glucose moiety of MGE. Peak 1 is  $C_{10}$ - $C4'$ -MGE. Peak 2 is  $C_{10}$ - $C6'$ -MGE. Solutions of  $50 \mu\text{M}$   $C_{10}$ - $C6'$ -MGE were prepared and incubated at room temperature for 30 min in aqueous solution at pH ~5 ( $\text{H}_2\text{O}$ ), pH 7 (75 mM Tris-HCl), pH 8 (75 mM Tris-HCl) and pH 9 (10 mM CHES). Migration to the  $C6'$  position is accelerated by the presence of base. Some background hydrolysis of the ester bond between  $C_{10}$  and MGE is observed at pH 9. (b) Incubation of  $50 \mu\text{M}$   $C_{10}$ - $C6'$ -MGE at room temperature in pH 8 buffer (75 mM Tris-HCl). Some formation (~10%) of  $C_{10}$ - $C4'$ -MGE is observed during this timeframe.

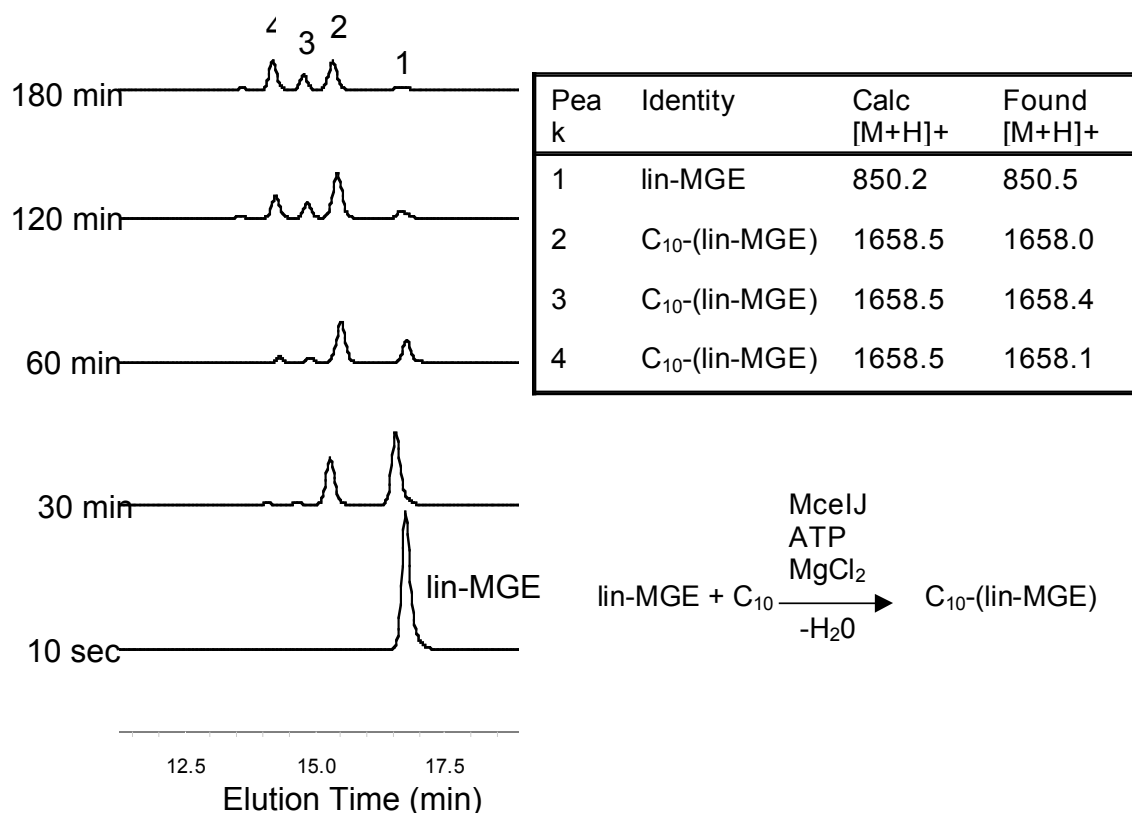

**Figure S5.** MceIJ-catalyzed attachment of lin-MGE to the C<sub>10</sub> peptide (2  $\mu\text{M}$  MceIJ, 100  $\mu\text{M}$  lin-MGE, 500  $\mu\text{M}$  C<sub>10</sub>, 5 mM ATP, 5 mM MgCl<sub>2</sub>, 75 mM Tris-HCl pH 8).

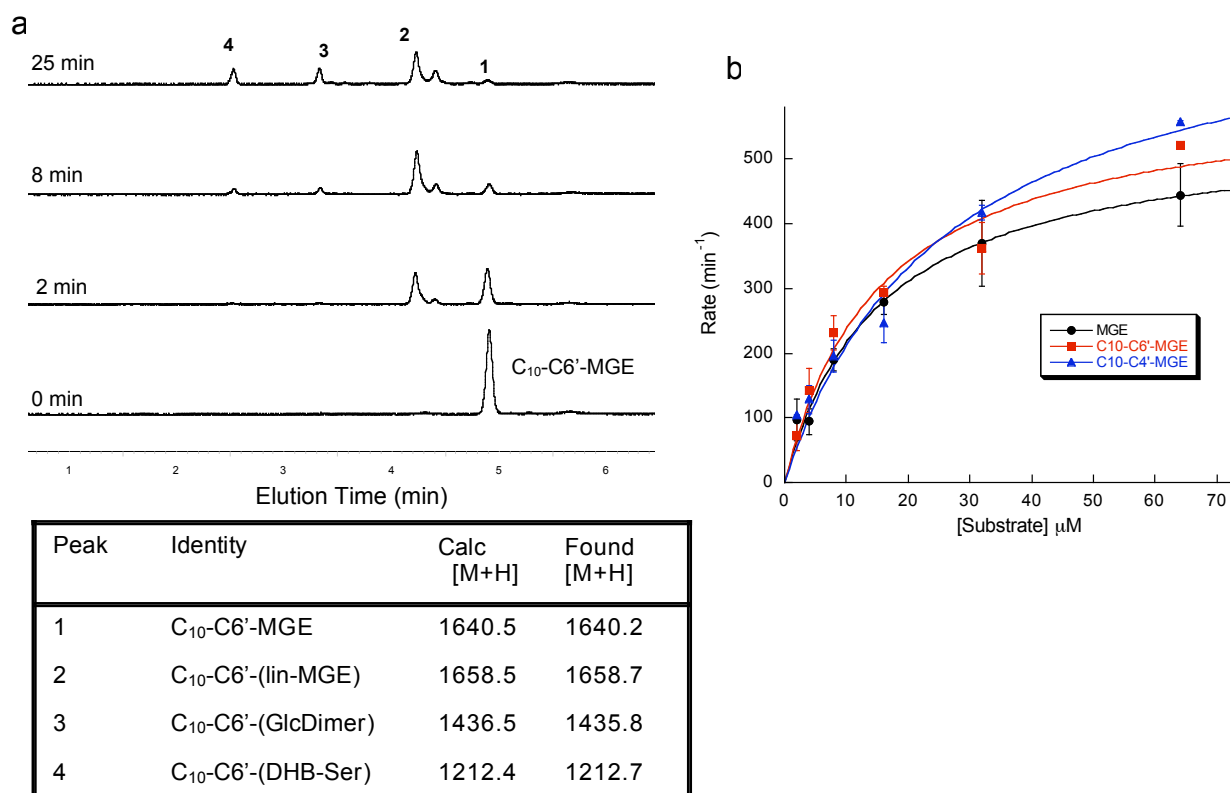

**Figure S6.** (a) MceD-catalyzed hydrolysis of the MGE moiety in C<sub>10</sub>-C6'-MGE (20 nM MceD, 32 μM C<sub>10</sub>-C6'-MGE, 75 mM Hepes pH 7.5). (b) Kinetic traces for the MceD-catalyzed hydrolysis of C<sub>10</sub>-C6'-MGE, C<sub>10</sub>-C4'-MGE and MGE. Corresponding kinetic parameters are given in Table 2 of the main text.

## Representative NMR Spectra

$^1\text{H}$  NMR and HBMIC of DGE isolated from MceC-catalyzed glycosylation of Ent.

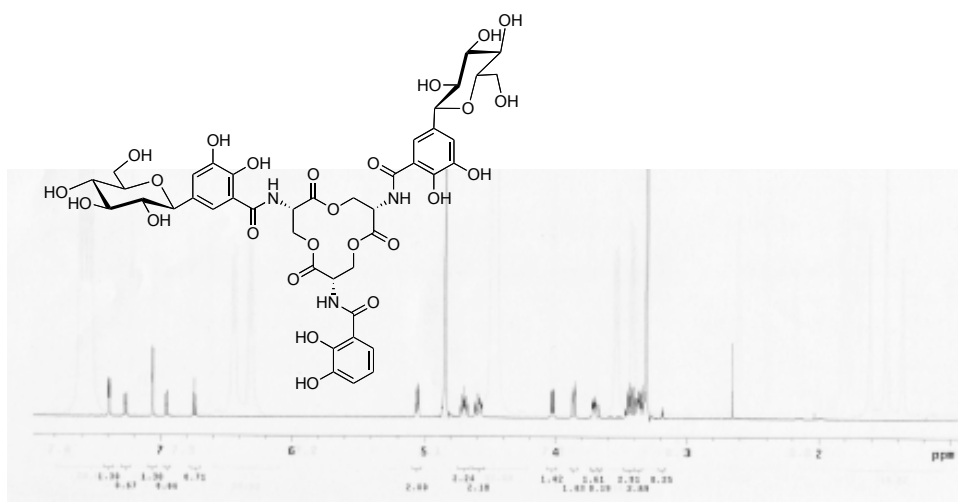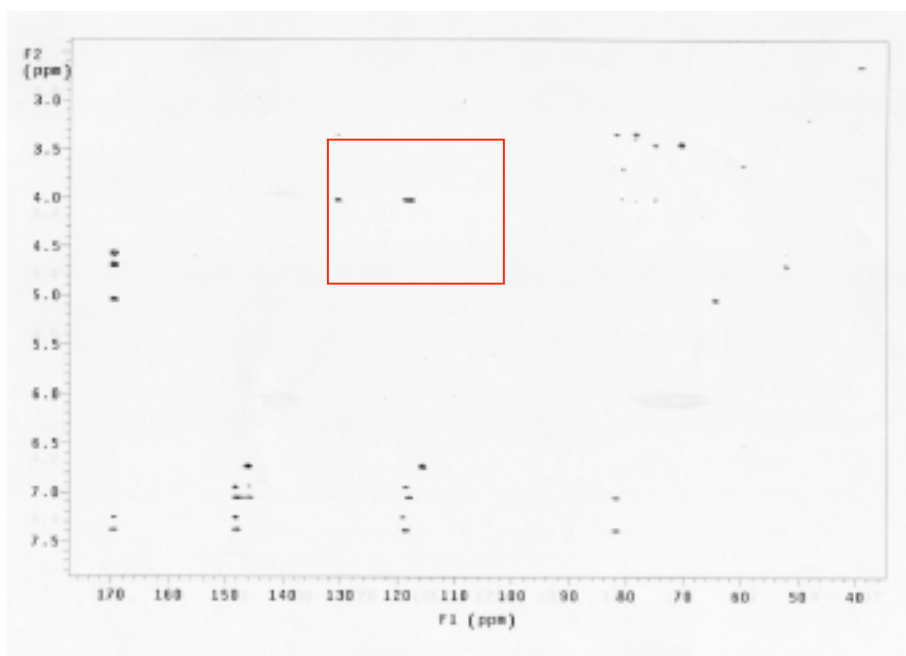

$^1\text{H}$  NMR of MGE isolated from MceC-catalyzed glycosylation of Ent.

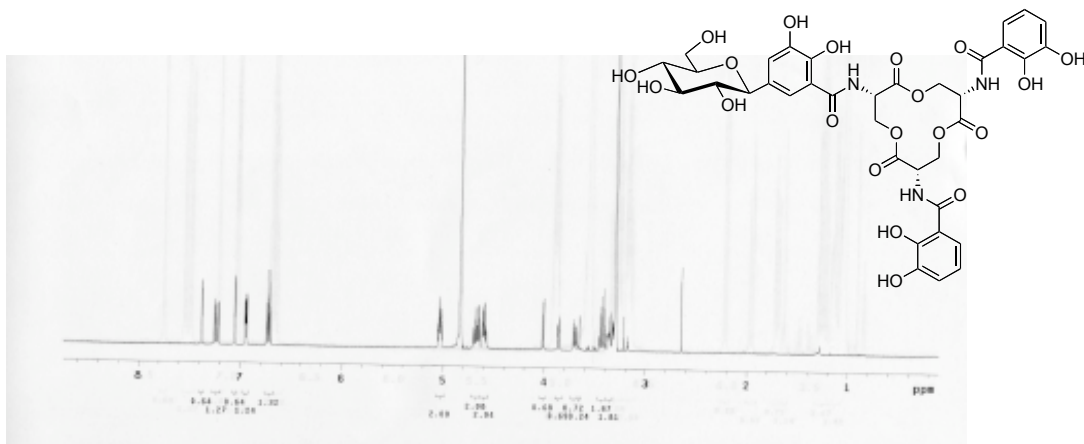

$^1\text{H}$  NMR of linear MGE isolated from MceD-catalyzed hydrolysis of MGE.

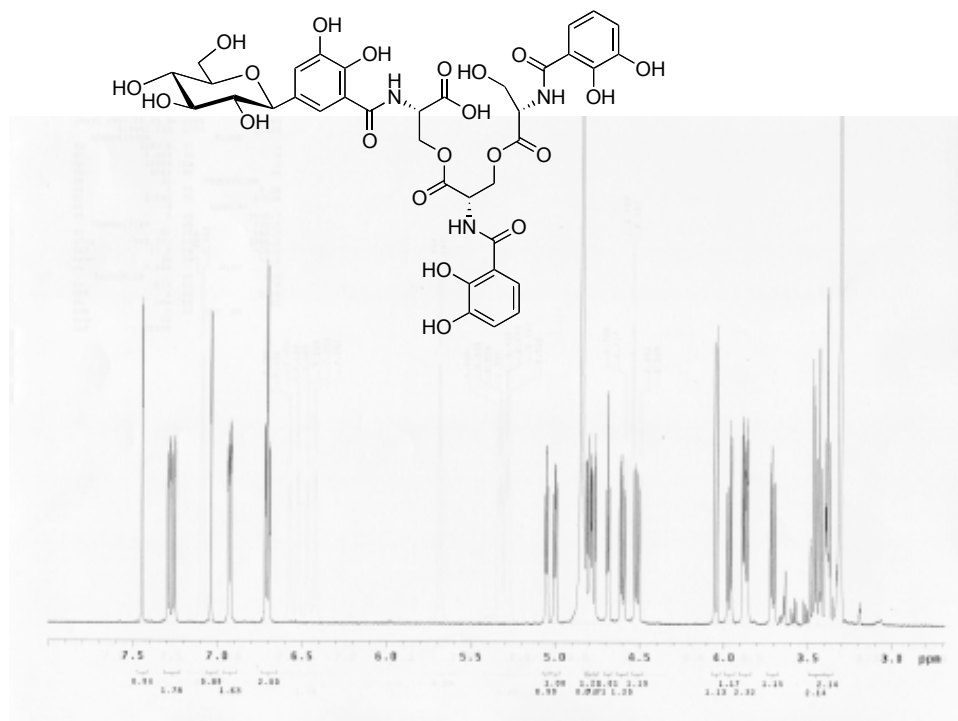

$^1\text{H}$  NMR of MGE isolated from MceC-catalyzed glycosylation of Ent.



$^1\text{H}$  NMR of linear MGE isolated from MceD-catalyzed hydrolysis of MGE.

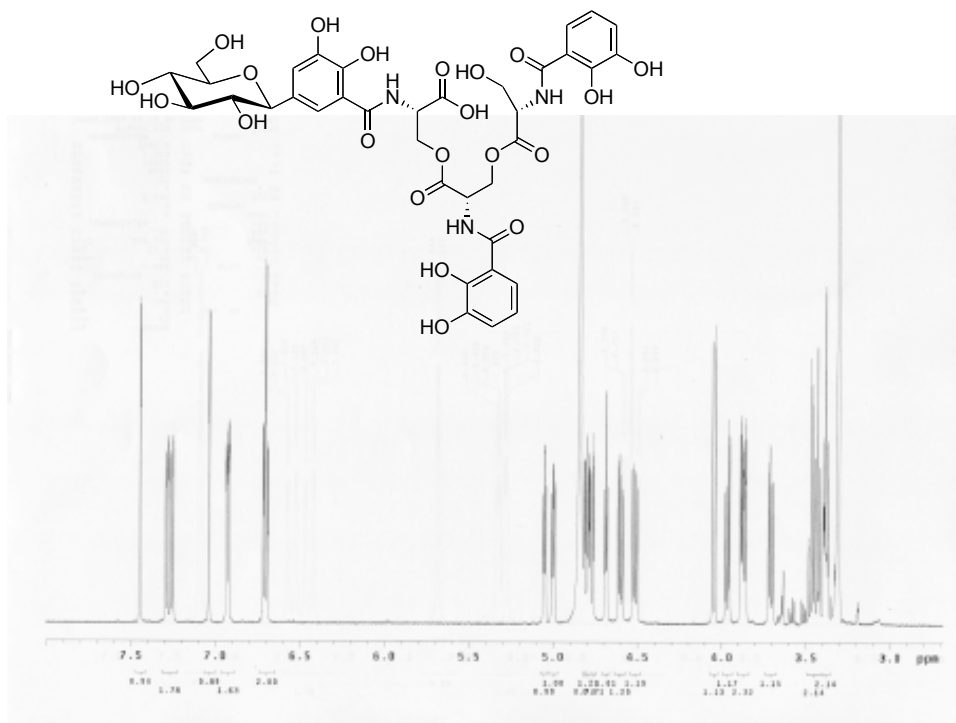

$^1\text{H}$  NMR of Glc-Dimer isolated from MceD-catalyzed hydrolysis of MGE.

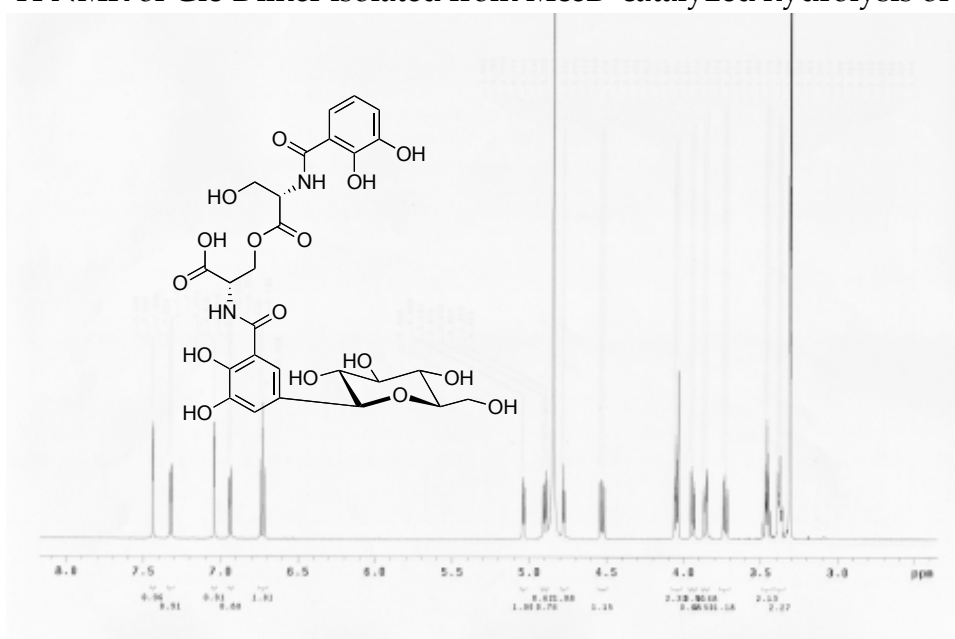

$^1\text{H}$  NMR of linear DGE from MceD-catalyzed hydrolysis of DGE.

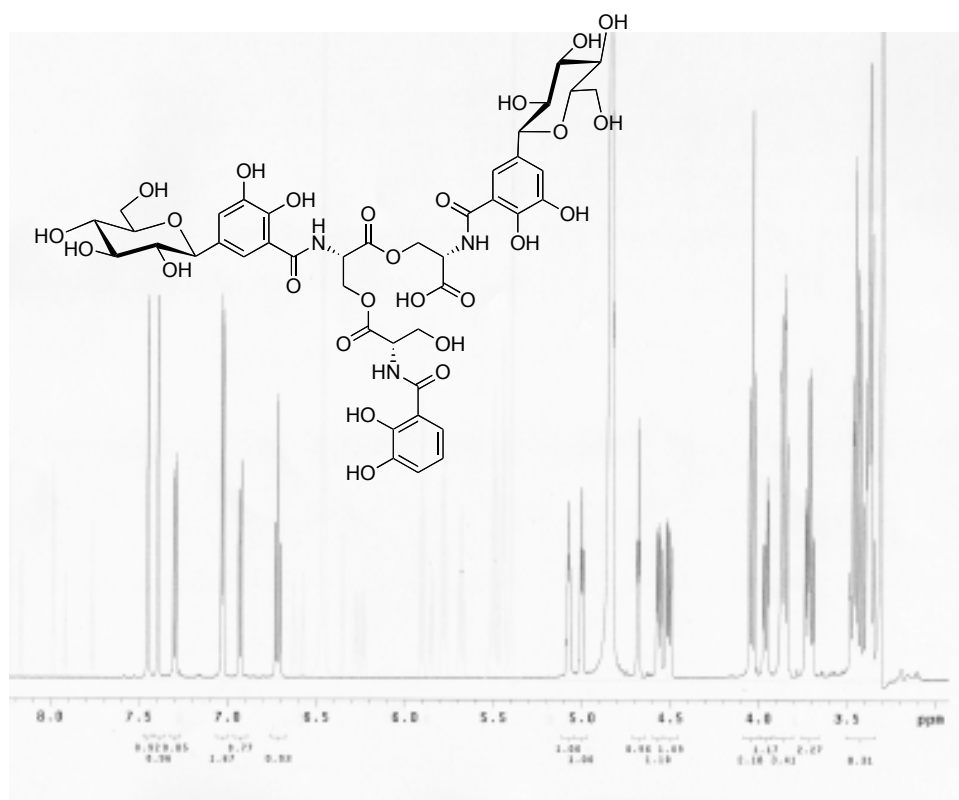

Supplement: NIHMS62726-supplement-1si20070830_09.pdf [file NIHMS62726-supplement-1si20070830_09.pdf]
